# Supplementary material for: Space Theory
Source: Preprints.org preprint supplement (doi:10.20944/preprints202105.0197.v7), 2023-09-27
Supplement: Supplementary file 1 [file supplementary]

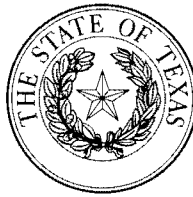

## Office of the Secretary of State

### CERTIFICATE OF FILING OF

Rheast LLC  
File Number: 804002889

The undersigned, as Secretary of State of Texas, hereby certifies that a Certificate of Formation for the above named Domestic Limited Liability Company (LLC) has been received in this office and has been found to conform to the applicable provisions of law.

ACCORDINGLY, the undersigned, as Secretary of State, and by virtue of the authority vested in the secretary by law, hereby issues this certificate evidencing filing effective on the date shown below.

The issuance of this certificate does not authorize the use of a name in this state in violation of the rights of another under the federal Trademark Act of 1946, the Texas trademark law, the Assumed Business or Professional Name Act, or the common law.

Dated: 04/02/2021

Effective: 04/02/2021

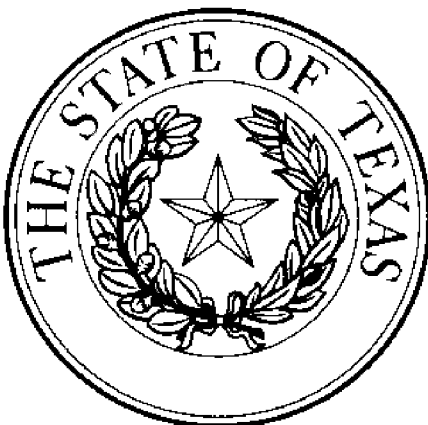

A handwritten signature in black ink, appearing to read "Ruth R. Hughs".

Ruth R. Hughs  
Secretary of State
